# Supplementary material for: Mechanism of Action of Isopropoxy Benzene Guanidine against Multidrug-Resistant Pathogens
Source: PubMed Central journal article supplement (PMC9927234; doi:10.1128/spectrum.03469-22), 2022-12-08
Supplement: spectrum.03469-22-s0001.pdf [file spectrum.03469-22-s0001.pdf]

## **Isopropoxy Benzene Guanidine Against Multidrug-Resistant Pathogens**

Jie Li <sup>a, b, c†</sup>, Xiufeng Zhang <sup>a, b, c†</sup>, Ning Han <sup>a, b, c</sup>, Peng Wan <sup>a, b, c</sup>, Feifei Zhao <sup>a, b, c</sup>,  
Tiantian Xu <sup>a, b, c</sup>, Xianfeng Peng <sup>d</sup>, Wenguang Xiong <sup>a, b, c</sup>, Zhenling Zeng <sup>a, b, c \*</sup>

a Guangdong Provincial Key Laboratory of Veterinary Pharmaceutics Development and Safety Evaluation, College of Veterinary Medicine, South China Agricultural University, Guangzhou 510642, China.

b National Laboratory of Safety Evaluation (Environmental Assessment) of Veterinary Drugs, South China Agricultural University, Guangzhou 510642, China.

c National Risk Assessment Laboratory for Antimicrobial Resistance of Animal Original Bacteria, South China Agricultural University, Guangzhou 510642, China.

d Guangzhou Insider Biotechnology Co., Ltd, Guangzhou 510642, China

† These authors contribute equally.

\*Corresponding author.

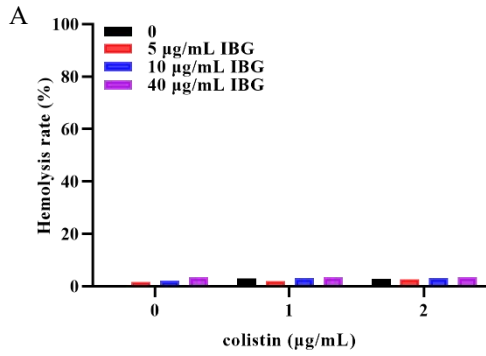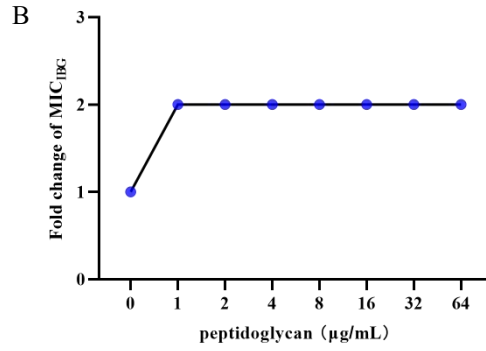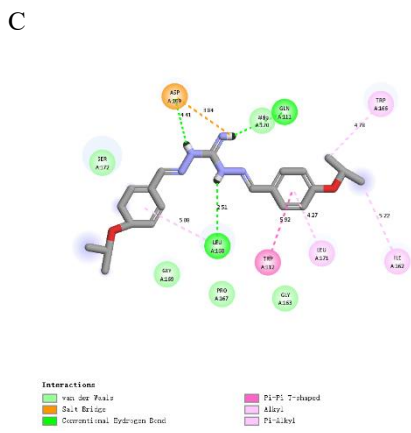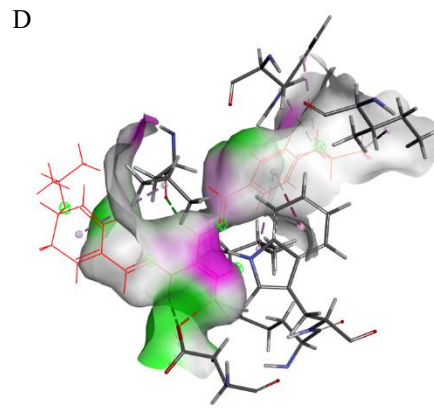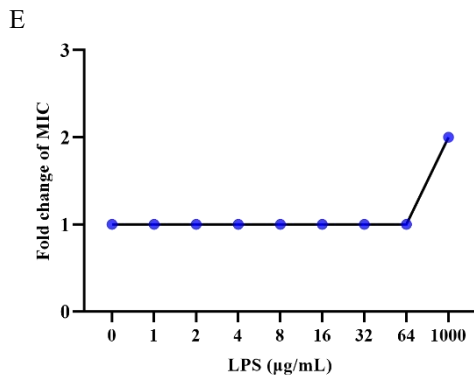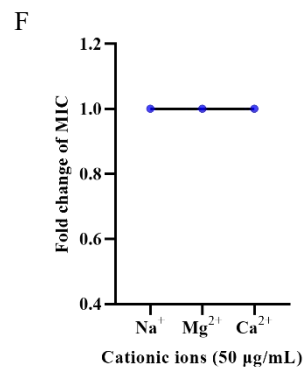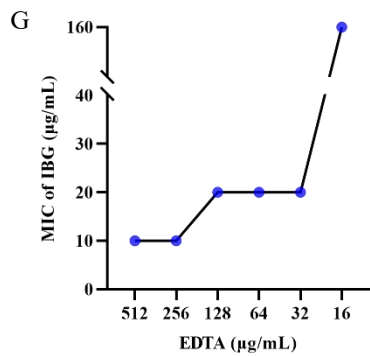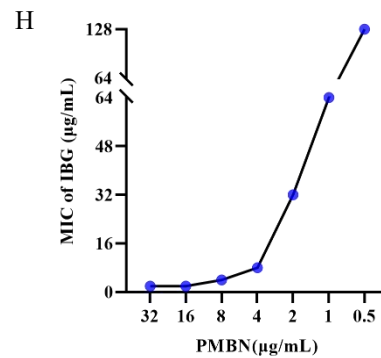

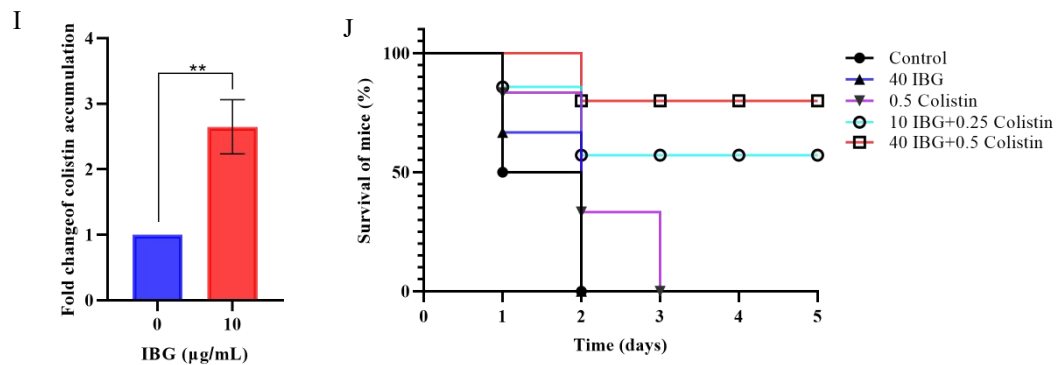

**Figure S1** The antibacterial effects of IBG against multidrug-resistant bacteria.

(A) The hemolytic activity of colistin (0, 1, 2 µg/mL) in the absence or presence of IBG on sheep red blood cells.

(B) Exogenous addition of peptidoglycan from *S. aureus* impairs the antibacterial activities of IBG slightly against *S. aureus* ATCC 29213 determined by checkerboard microdilution assay.

(C, D) 2D molecular interactions (C) and 3D molecular interactions (D) of IBG and *pgsA* was assessed by receptor-ligand interaction analysis.

(E) The change in MIC of IBG against *S. aureus* ATCC 29213 in the presence of lipopolysaccharide (LPS) ranges from 0 to 1 mg/mL. High levels of LPS (1 mg/mL) impair the antibacterial activity of IBG slightly.

(F) The change in MIC of IBG against *S. aureus* ATCC 29213 in the presence of 50 µg/mL different cations. Divalent cations had a neglectable influence on the antibacterial activity of IBG.

(G, H) A synergy of IBG with the EDTA (G) and PMBN (H) against *E. coli* ATCC25922 by checkerboard microdilution. PMBN and EDTA could increase the antibacterial activity of IBG in a dose-dependent manner.

(I) Effect of IBG on the accumulation of colistin in *E. coli* SHP45. Data were presented as means ±SD (n = 3 biological independent replicates) and t-test were used to calculate P-values (\*p < 0.05, \*\*p < 0.01).

(J) Survival rates of mice were infected with colistin-susceptible *E. coli* ATCC25922 in the mouse peritonitis–sepsis model.

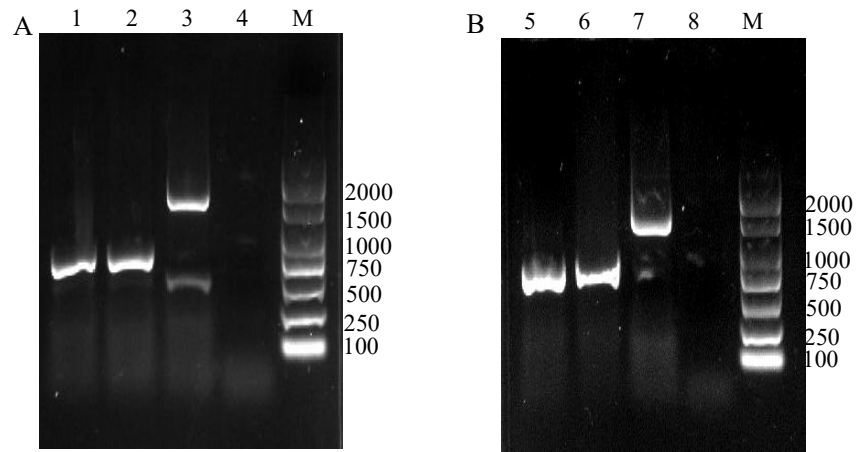

**Figure S2** Identification of the *E. coli* LPS deletion strains MG1655- $\Delta waaC$  (A) and MG1655- $\Delta waaP$  (B).

M: Standard DNA marker (DL-2000); 4, 8: Negative control; 1, 2: MG1655- $\Delta waaC$ ; 5, 6: MG1655- $\Delta waaP$ ; 3, 7: *E. coli* MG1655

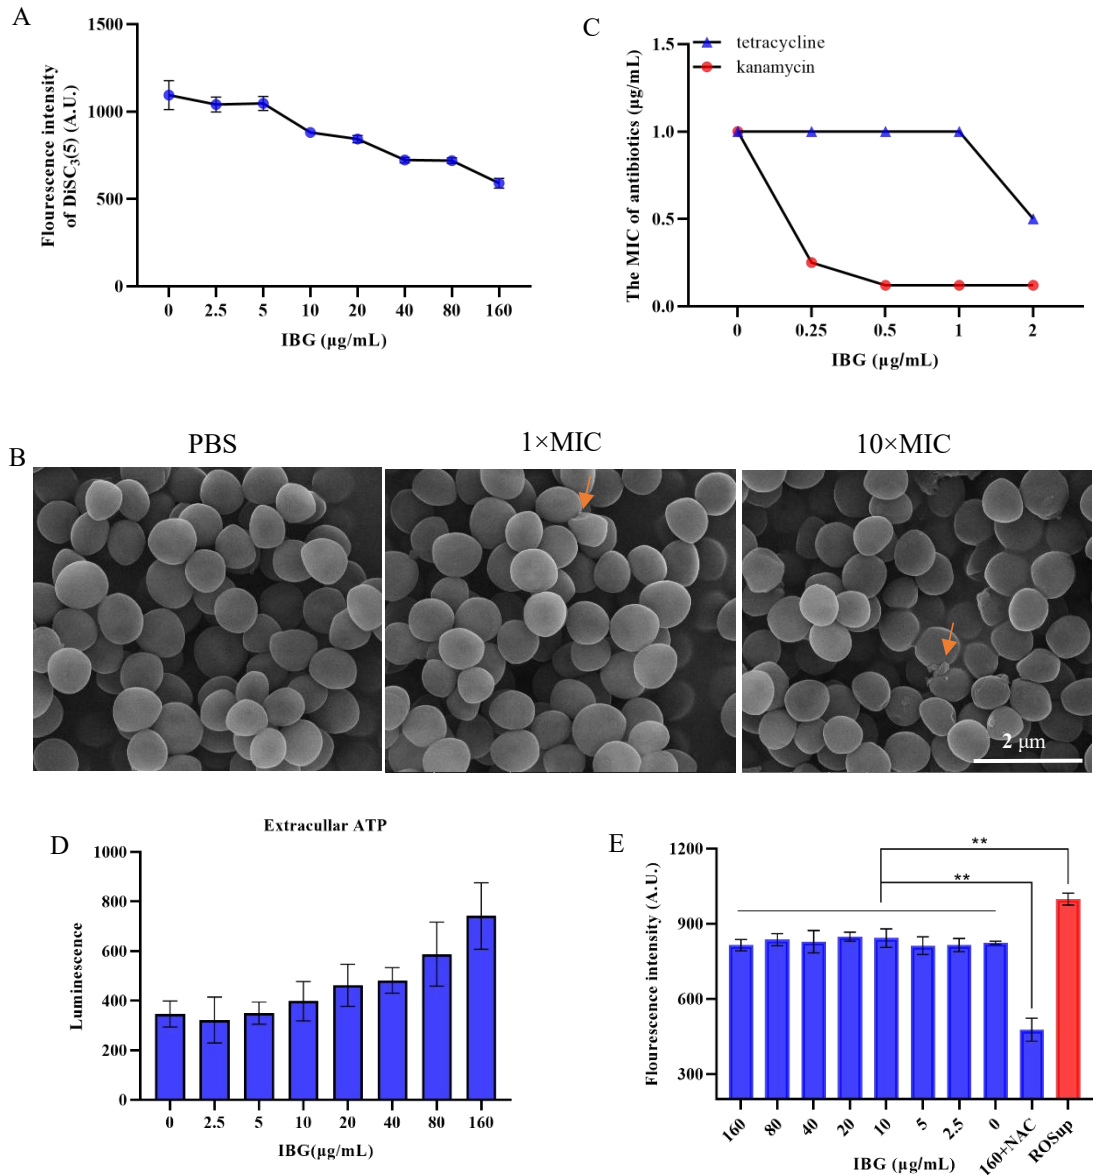

**Figure S3** Mechanism of IBG against Gram-positive bacteria

(A) Decreased the fluorescence of membrane potential in *S. aureus* ATCC 29213 treated with IBG. Membrane potential of the inner membrane was detected by DiSC<sub>3</sub>(5).

(B) Morphological changes of *S. aureus* ATCC 29213 incubated with various doses of IBG were imaged by FE-SEM, Scar bar, 2 μm. Bacteria without treated as control. The red arrows represent bacteria with destroyed and lysed structure.

(C) IBG is synergistic with kanamycin, and no synergy combined with tetracycline against *S.*

*aureus* ATCC 29213.

(D) Decreased levels of extracellular ATP in *S. aureus* ATCC 29213 after treatment of IBG.

(E) IBG had a neglectable influence on the accumulation of reactive oxygen species (ROS) against *S. aureus* ATCC 29213. Data points represent the mean value of three biological replicates, P-values was calculated by nonparametric one-way ANOVA (\*p < 0.05, \*\*p < 0.01).

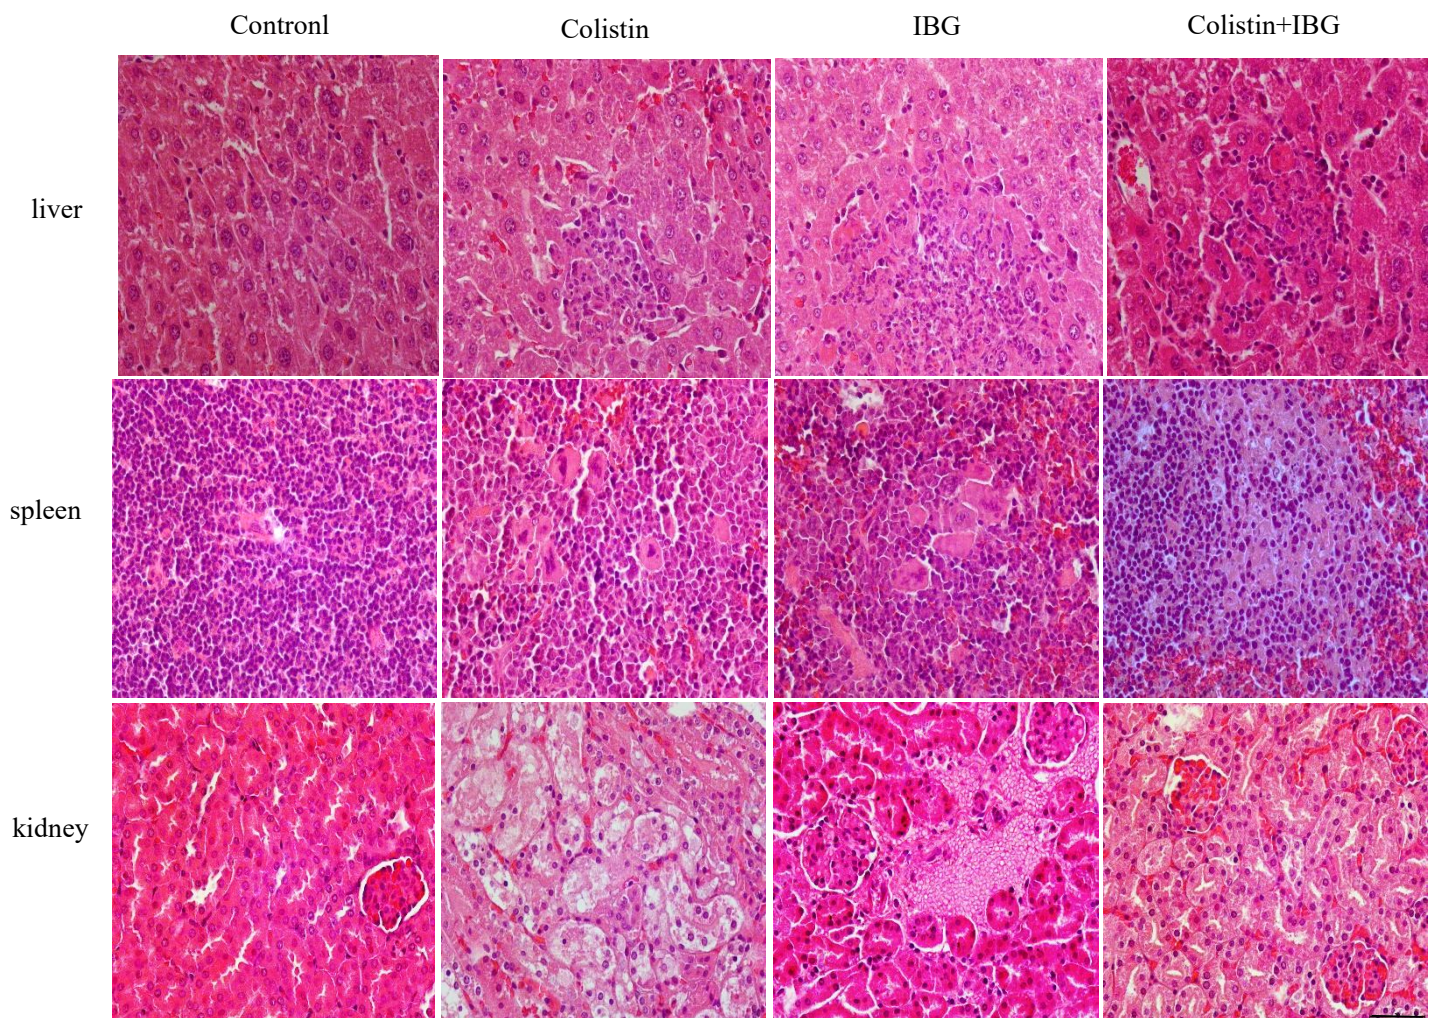

**Figure S4** Histologic analysis of different organs using hematoxylin-eosin (HE) staining  
The liver, spleen, and kidney were histological analysis in the mouse peritonitis-sepsis model. The results were representative of three biological repeats. Scar bar, 50  $\mu$ m.

**Table S1** FICI of combinations of IBG and other antimicrobial agents against *E. coli*

| Combination          | FICI       |        | Effect       |
|----------------------|------------|--------|--------------|
|                      | ATCC 25922 | SHP 45 |              |
| IBG+ polymyxin B     | 0.12       | 0.24   | Synergy      |
| IBG+ colistin        | 0.12       | 0.12   | Synergy      |
| IBG+ trimethoprim    | 0.6        | 0.6    | Addition     |
| IBG+ ceftazidime     | 2          | 2      | Indifference |
| IBG+ amoxicillin     | 2          | 2      | Indifference |
| IBG+ cefotaxime      | 2          | 2      | Indifference |
| IBG+ ceftoxitin      | 2          | 2      | Indifference |
| IBG+ meropenem       | 2          | 2      | Indifference |
| IBG+ tetracycline    | 2          | 2      | Indifference |
| IBG+ amikacin        | 2          | 2      | Indifference |
| IBG+ ciprofloxacin   | 2          | 2      | Indifference |
| IBG+ streptomycin    | 2          | 2      | Indifference |
| IBG+ chloramphenicol | 2          | 2      | Indifference |
| IBG+ florfenicol     | 2          | 2      | Indifference |
| IBG+ fosfomycin      | 2          | 2      | Indifference |
| IBG+ neomycin        | 2          | 2      | Indifference |



**Table S2** All Strains treated with the 10 µg/mL IBG combined with 0.25 µg/mL colistin

| strains                        | character        | strains                          | character        |
|--------------------------------|------------------|----------------------------------|------------------|
| <i>E. coli</i> ATCC25922       | reference strain | <i>k. pneumoniae</i><br>K52-2    | Wildtype         |
| <i>E. coli</i> SHP45           | <i>mcr-1</i>     | <i>k. pneumoniae</i><br>K35      | Wildtype         |
| <i>E. coli</i> GDQ20D140       | <i>mcr-1</i>     | <i>k. pneumoniae</i><br>K107-2   | Wildtype         |
| <i>E. coli</i> GDQ8D137        | <i>mcr-1</i>     | <i>K. pneumoniae</i> 117         | <i>mcr-1</i>     |
| <i>E. coli</i> GDQ8D43         | <i>mcr-1</i>     | <i>A. baumannii</i><br>ATCC19606 | reference strain |
| <i>E. coli</i> GDQ8D105        | <i>mcr-1</i>     | <i>A. baumannii</i> 131312       | Wildtype         |
| <i>E. coli</i> GDQ8P37         | <i>mcr-1</i>     | <i>A. baumannii</i> 130939       | Wildtype         |
| <i>Salmonella</i><br>ATCC14028 | reference strain | <i>A. baumannii</i> 131172       | Wildtype         |
| <i>Salmonella</i> 26FS14       | <i>mcr-1</i>     | <i>P. muhocida</i><br>CVCC434    | reference strain |
| <i>Salmonella</i> S226         | <i>mcr-1</i>     | <i>P. muhocida</i> 18            | Wildtype         |
| <i>Salmonella</i> S235         | <i>mcr-1</i>     | <i>P. muhocida</i> 23            | Wildtype         |
| <i>Salmonella</i> F18126S      | <i>mcr-1</i>     | <i>P. multocida</i> 89           | Wildtype         |
| <i>Salmonella</i> F19062S      | Wildtype         | <i>P. multocida</i> 117          | Wildtype         |
| <i>Salmonella</i> F19139S      | Wildtype         | <i>Salmonella</i> F19112S        | Wildtype         |
| <i>Salmonella</i> F19069S      | Wildtype         |                                  |                  |

**Table S3** The MIC of IBG against *E. coli* LPS mutant bacteria

| Organism              | MIC ( $\mu\text{g/mL}$ ) |          | FICI  |
|-----------------------|--------------------------|----------|-------|
|                       | IBG                      | Colistin |       |
| MG1655                | >256                     | 0.5      | 0.06  |
| MG1655- $\Delta waaC$ | 4                        | 0.12     | 0.625 |
| MG1655- $\Delta waaP$ | 4                        | 0.12     | 0.75  |

**Table S4** MRM parameters for the determination of colistin by LC-MS/MS

| <b>Compound</b> | <b>Precursor ion<br/>(m/z)</b> | <b>Product ions<br/>(m/z)</b> | <b>Q1 pre bias<br/>(V)</b> | <b>Collision<br/>energy (eV)</b> | <b>Q3 pre bias<br/>(V)</b> |
|-----------------|--------------------------------|-------------------------------|----------------------------|----------------------------------|----------------------------|
| Colistin A      | <b>390.7</b>                   | <b>101.1</b>                  | <b>29</b>                  | <b>21</b>                        | <b>11</b>                  |
|                 |                                | <b>384.8*</b>                 | <b>16</b>                  | <b>13</b>                        | <b>29</b>                  |
| Colistin B      | 385.95                         | 101.1*                        | 10                         | 22                               | 28                         |
|                 |                                | 379.9                         | 28                         | 13                               | 21                         |

**Table S5** Bacterial strains used in this study

| strains                       | character        | strains                             | character        |
|-------------------------------|------------------|-------------------------------------|------------------|
| <i>S. aureus</i> ATCC 29213   | reference strain | <i>K. pneumoniae</i> K52-2          | Wildtype         |
| <i>E. faecalis</i> ATCC 29212 | reference strain | <i>K. pneumoniae</i> K35            | Wildtype         |
| <i>E. coli</i> ATCC 25922     | reference strain | <i>K. pneumoniae</i> K107-2         | Wildtype         |
| <i>E. coli</i> SHP45          | <i>mcr-1</i>     | <i>K. pneumoniae</i> MPC11+pHNSHP45 | <i>mcr-1</i>     |
| <i>E. coli</i> GDQ20D140      | <i>mcr-1</i>     | <i>K. pneumoniae</i> MPC11          | Wildtype         |
| <i>E. coli</i> GDQ8D137       | <i>mcr-1</i>     | <i>K. pneumoniae</i> 117            | <i>mcr-1</i>     |
| <i>E. coli</i> GDQ8D43        | <i>mcr-1</i>     | <i>K. pneumoniae</i> 281            | <i>mcr-1</i>     |
| <i>E. coli</i> GDQ8D105       | <i>mcr-1</i>     | <i>A. baumannii</i> ATCC19606       | reference strain |
| <i>E. coli</i> GDQ8P37        | <i>mcr-1</i>     | <i>A. baumannii</i> 131312          | Wildtype         |
| <i>Salmonella</i> F19112S     | Wildtype         | <i>A. baumannii</i> 130939          | Wildtype         |
| <i>Salmonella</i> ATCC14028   | reference strain | <i>A. baumannii</i> 131284          | Wildtype         |
| <i>Salmonella</i> 26FS14      | <i>mcr-1</i>     | <i>A. baumannii</i> 131172          | Wildtype         |
| <i>Salmonella</i> S226        | <i>mcr-1</i>     | <i>P. muhocida</i> CVCC434          | reference strain |
| <i>Salmonella</i> S235        | <i>mcr-1</i>     | <i>P. muhocida</i> CVCC 399         | reference strain |
| <i>Salmonella</i> F18126S     | <i>mcr-1</i>     | <i>P. muhocida</i> 18               | Wildtype         |
| <i>Salmonella</i> F19062S     | Wildtype         | <i>P. muhocida</i> 23               | Wildtype         |
| <i>Salmonella</i> F19139S     | Wildtype         | <i>P. muhocida</i> 89               | Wildtype         |
| <i>Salmonella</i> F19069S     | Wildtype         | <i>P. muhocida</i> 117              | Wildtype         |
| <i>Salmonella</i> F19112S     | Wildtype         | <i>K. pneumoniae</i> ATCC 700603    | reference strain |

**Table S6** Primers used in this study

| Primer names  | Sequence (5' to 3')                    | Product size ( bp ) |
|---------------|----------------------------------------|---------------------|
| pEcgRNA -F    | TTTTGTGATGCTCGTCAGGGGG                 | 643                 |
| pEcgRNA -R    | CGCTCGATGACGCCAACTACCT                 |                     |
| waaC-F1       | TTTGAATACCGAGCAGCAGGCA                 | 349                 |
| waaC-F2       | ATGTTAGCATGTTTTACCTCCGTCAGGCTTCCTCTTGT |                     |
| waaC-F3       | ACAAGAGGAAGCCTGACGGAGGTAAAACATGCTAACAT |                     |
| waaC-F4       | ACTATGGTAAGTAGCACGAAATGG               | 324                 |
| waaCtest-F    | GATTAAGTTTACTGGGTGGT                   | 756                 |
| waaCtest-R    | GTTGGTCCATAAACCGTGATA                  |                     |
| waaCspacer-F  | TAGTGGGGTTAAGCCATTTAACGG               | --                  |
| waaCspacer-R  | AAACCCGTTAAATGGCTTAACCCC               |                     |
| waaP-F1       | ATCTTCGCCAACAGTATTTCTTAG               | 345                 |
| waaP-F2       | TCATTACAGGTGGTTTAGAAATATTTATTAGTATGTAC |                     |
| waaP-F3       | GTACATACTAATAAATATTTCTAAACCACCTGTAATGA | 311                 |
| waaP-F4       | AGCCGCTGATTTATTACTGC                   |                     |
| waaPtest-F    | GTTGCTCTTTAATACGCTC                    | 748                 |
| waaPtest-R    | TTTGGCGTGGTAAAGATGCT                   |                     |
| waaPspacer-F  | TAGTAGTGGCAAATGTAACAGTCG               | --                  |
| waaPspacer-R  | AAACCGACTGTTACATTTGCCACT               |                     |
| mcr-1-RTPCR-F | AAAGACGCGGTACAAGCAAC                   | 213                 |
| mcr-1-RTPCR-R | GCTGAACATACACGGCACAG                   |                     |
| 16s-RTPCR-F   | TCCTACGGGAGGCAGCAGT                    | 467                 |
| 16s-RTPCR-R   | GGACTACCAGGGTATCTAATCCTGTT             |                     |
